# Supplementary material
Source: PubMed Central journal article supplement (PMC2760841)
Supplement: NIHMS149010-supplement-Supp_Tables.pdf [file NIHMS149010-supplement-Supp_Tables.pdf]

**Supplementary Table 1.** Tumor properties from asymptomatic adult Mut3 or Mut4 mice used for MRI

| Genotype        | ID              | Age<br>(weeks) <sup>a</sup> | Tumor volume <sup>b</sup> |                      | Growth per<br>week (%)     | Grade                                                              | Ki67 density (%) <sup>c</sup>                                      |      |
|-----------------|-----------------|-----------------------------|---------------------------|----------------------|----------------------------|--------------------------------------------------------------------|--------------------------------------------------------------------|------|
|                 |                 |                             | 1 <sup>st</sup> scan      | 2 <sup>nd</sup> scan |                            |                                                                    |                                                                    |      |
| Mut3<br>(n = 3) | 8495            | 26.7                        | 0.051 (1/05)              | 0.060 (1/13)         | 15.44                      | 3                                                                  | 21.9                                                               |      |
|                 | 9042            | 25.3                        | 0.027 (2/16)              | 0.029 (2/23)         | 7.41                       | 3                                                                  | 12.1                                                               |      |
|                 | 11714           | 22.7                        | 0.045 (8/10)              | 0.065 (8/17)         | 44.44                      | 3                                                                  | 31.4                                                               |      |
|                 | mean            | 24.9                        |                           | 0.051                | 22.43 ± 11.25 <sup>d</sup> |                                                                    | 21.8 ± 5.6 <sup>d</sup>                                            |      |
|                 | 8625            | 21.6                        |                           |                      |                            |                                                                    | Excluded; no tumor detection for 3 weeks                           |      |
|                 | 9044            | 27.3                        | 0.002 (2/23)              | 0.0022 (3/2)         | 10.00                      |                                                                    | Excluded; too small tumor at 1 <sup>st</sup> scanning <sup>e</sup> |      |
|                 | 11415           | 26.3                        |                           |                      |                            |                                                                    | Excluded; no tumor detection for 2 weeks                           |      |
|                 | 11685           | 23.4                        |                           |                      |                            |                                                                    | Excluded; no tumor detection for 2 weeks                           |      |
|                 | Mut4<br>(n = 6) | 8985                        | 17.9                      | 0.014 (12/12)        | 0.031 (12/19)              | 121.43                                                             | 3                                                                  | 47.5 |
|                 |                 | 9505                        | 13.1                      | 0.023 (12/27)        | 0.042 (1/5)                | 42.03                                                              | 3                                                                  | 30.3 |
| 9660            |                 | 14.1                        | 0.031 (1/13)              | 0.058 (1/20)         | 87.10                      | 3                                                                  | 37.4                                                               |      |
| 10590           |                 | 17.1                        | 0.041 (4/13)              | 0.073 (4/20)         | 78.05                      | 3                                                                  | 35.7                                                               |      |
| 10594           |                 | 14.1                        | 0.012 (3/23)              | 0.021 (3/30)         | 75.00                      | 3                                                                  | 39.6                                                               |      |
| 12130           |                 | 18.0                        | 0.029 (8/10)              | 0.085 (8/17)         | 193.10                     | 3                                                                  | 67.8                                                               |      |
| mean            |                 | 15.7                        |                           | 0.052                | 99.45 ± 23.46 <sup>d</sup> |                                                                    | 43.1 ± 5.5 <sup>d</sup>                                            |      |
| 9075            |                 | 16.3                        |                           |                      |                            |                                                                    | Excluded; death during 1 <sup>st</sup> scanning                    |      |
| 9573            |                 | 14.1                        | 0.013 (1/5)               |                      |                            |                                                                    | Excluded; death during 1 <sup>st</sup> scanning                    |      |
| 10448           |                 | 11.4                        |                           |                      |                            |                                                                    | Excluded; no tumor detection for 6 weeks                           |      |
| 10592           | 17.1            | 0.006 (4/13)                | 0.032 (4/20)              | 433.33               |                            | Excluded; too small tumor at 1 <sup>st</sup> scanning <sup>e</sup> |                                                                    |      |
| 10589           | 14.1            | 0.032 (3/23)                |                           |                      |                            | Excluded; death before 2 <sup>nd</sup> scanning                    |                                                                    |      |

<sup>a</sup>Age at the first scan<sup>b</sup>Tumor volume in cm<sup>3</sup> (date of scanning)<sup>c</sup>Ki67 density = the highest ratio of Ki67-positive cells / total cells (DAPI-positive) in a 0.44 X 0.35 mm<sup>2</sup> field<sup>d</sup>Mean ± standard error mean<sup>e</sup>Tumors with volume smaller than 0.01 cm<sup>3</sup> at the 1<sup>st</sup> scan were excluded to compare tumors at a similar stage and size.

**Supplementary Table 2.** Sequence of PCR primers used to measure LOH of Nf1 and Pten

| PCR for                  | Name | Sequence                                     | Product size (bp)           |
|--------------------------|------|----------------------------------------------|-----------------------------|
| <i>Nf1</i> <sup>f</sup>  | g54  | 5'-AATGT GAAAT TGGTG TCGAG TAAGG TAACC AC-3' | <i>wt</i> : 493             |
|                          | g35  | 5'-TTAAG AGCAT CTGCT GCTCT TAGAG GGAA-3'     | <i>loxP</i> : ~600          |
|                          | g53  | 5'-TCAGA CTGAT TGTTG TACCT GATGG TTGTA CC-3' | $\Delta$ <i>loxP</i> : ~300 |
| <i>Pten</i> <sup>f</sup> | F2   | 5'-CCATC ACACT AAGGT CTGTG G-3'              | <i>wt</i> : 135             |
|                          | R    | 5'-ACTCC CACCA ATGAA CAAAC-3'                | <i>loxP</i> : 346           |
|                          | hD1  | 5'-CCAGT AGTGA TAGAA CGGAA GTC-3'            | $\Delta$ <i>loxP</i> : 410  |

**Supplementary Table 3.** Grade and location of malignant astrocytomas found in symptomatic Mut3, Mut4 or Mut6 mice

| Genotype         | ID    | Age (weeks) | Grade | Location of tumor            |
|------------------|-------|-------------|-------|------------------------------|
| Mut3<br>(n = 11) | 1512  | 27.0        | 3     | Thalamus/pons/Mb             |
|                  | 2214  | 32.6        | 3     | Most forebrain including SVZ |
|                  | 2512  | 13.0        | 4     | Most forebrain including SVZ |
|                  | 2897  | 28.4        | 3     | Most forebrain including SVZ |
|                  | 2898  | 26.0        | 3     | Thalamus/pons                |
|                  | 3853  | 31.0        | 3     | St/SVZ/BS                    |
|                  | 5780  | 44.0        | 4     | St/RMS/OB                    |
|                  | 6634  | 33.6        | 3     | Cx, SVZ, BS                  |
|                  | 6953  | 28.4        | 3     | Most forebrain including SVZ |
|                  | 8495  | 27.9        | 3     | St/RMS                       |
|                  | 14047 | 16.7        | 4     | St/RMS/SVZ/Thalamus/Ht       |
| Mut4<br>(n = 10) | 652   | 25.7        | 3     | Pons/Cb                      |
|                  | 749   | 16.7        | 4     | Most forebrain including SVZ |
|                  | 2244  | 13.1        | 3     | CC/St                        |
|                  | 2247  | 14.1        | 3     | Cx/CC, thalamus              |
|                  | 2735  | 14.9        | 3     | Most forebrain including SVZ |
|                  | 2737  | 22.3        | 4     | RMS/St/CC/SVZ, Hp, BS        |
|                  | 2901  | 28.4        | 3     | Most brain, except Cb        |
|                  | 2909  | 17.4        | 3     | Most forebrain including SVZ |
|                  | 4025  | 17.3        | 3     | OB                           |
|                  | 5895  | 20.0        | 3     | St/SVZ/thalamus              |
| Mut5<br>(n = 6)  | 4567  | 23.4        | 4     | St, caudal CC, Cb            |
|                  | 11719 | 20.0        | 3     | OB                           |
|                  | 11724 | 22.7        | 3     | St/SVZ                       |
|                  | 11908 | 22.4        | 4     | CC/SVZ/DG                    |
|                  | 11995 | 26.6        | 4     | St/SVZ/Thalamus              |
|                  | 12365 | 20.0        | 4     | Thalamus/Ht                  |
| Mut6<br>(n = 8)  | 5142  | 14.4        | 4     | Caudal CC/Mb/Ht              |
|                  | 5239  | 14.1        | 4     | CC/Cx, BS                    |
|                  | 5245  | 12.9        | 4     | Pons/Mb                      |
|                  | 5586  | 14.3        | 4     | Most forebrain including SVZ |
|                  | 8214  | 18.3        | 4     | St, Caudal CC/Mb/Cb          |
|                  | 8227  | 16.7        | 4     | Most forebrain including SVZ |
|                  | 10427 | 17.9        | 4     | St/SVZ/thalamus              |
|                  | 10897 | 10.7        | 3     | St, Cb                       |

BS, brain stem; CC, corpus callosum; Cb, cerebellum; Cx, cerebral cortex; DG, dentate gyrus; Hp, hippocampus; Ht, hypothalamus; Mb, midbrain; OB, olfactory bulb; RMS, rostral migratory stream; St, striatum; SVZ, subventricular zone

**Supplementary Table 4.** BrdU signals detected in the vicinity of the SVZ/RMS of 7-week-old mice one week after labeling

| Genotype                                   | Mouse ID                 | Number of BrdU-positive cells <sup>a</sup> |                         |                    |
|--------------------------------------------|--------------------------|--------------------------------------------|-------------------------|--------------------|
|                                            |                          | r. CC <sup>b</sup>                         | r. St <sup>c</sup>      | c. St <sup>d</sup> |
| Control:                                   | 12572                    | 27                                         | 3                       | 4                  |
| <i>p53</i> <sup>+/-</sup><br>(n = 6)       | 12574                    | 26                                         | 6                       | 7                  |
|                                            | 12578                    | 10                                         | 6                       | 4                  |
|                                            | 15357                    | 32                                         | 5                       | 6                  |
|                                            | 15360                    | 9                                          | 5                       | 5                  |
|                                            | 15512                    | 21                                         | 4                       | 4                  |
|                                            | average                  |                                            | 20.8 ± 9.5 <sup>e</sup> | 4.8 ± 1.2          |
| <i>cre; Pten</i> <sup>f/+</sup><br>(n = 2) | 9224                     | 22                                         | 7                       | 8                  |
|                                            | 15548                    | 25                                         | 6                       | 1                  |
| Mut3<br>(n = 2)                            | 15374                    | 25                                         | 7                       | 2                  |
|                                            | 15377                    | 7                                          | 8                       | 8                  |
| Mut4<br>(n = 3)                            | 15510                    | 24                                         | 2                       | 3                  |
|                                            | <b>15511<sup>f</sup></b> | <b>56</b>                                  | <b>119</b>              | <b>38</b>          |
|                                            | 15546                    | 16                                         | 6                       | 6                  |
| Mut5<br>(n = 3)                            | 12573                    | 32                                         | 8                       | 6                  |
|                                            | 12575                    | 11                                         | 8                       | 7                  |
|                                            | 12579                    | 24                                         | 9                       | 8                  |
| Mut6<br>(n = 3)                            | <b>9219</b>              | <b>59</b>                                  | 9                       | <b>14</b>          |
|                                            | <b>9220</b>              | <b>57</b>                                  | <b>30</b>               | 9                  |
|                                            | <b>9221</b>              | 37                                         | <b>32</b>               | <b>28</b>          |

<sup>a</sup>Anatomically matched sections were stained with BrdU antibody and subsequently visualized by Alexa-488-conjugated anti-mouse IgG antibody. BrdU-positive cells in below regions in a 0.87 X 0.69 mm<sup>2</sup> area were counted.

<sup>b</sup>Rostral corpus callosum

<sup>c</sup>Rostral striatum

<sup>d</sup>Caudal striatum

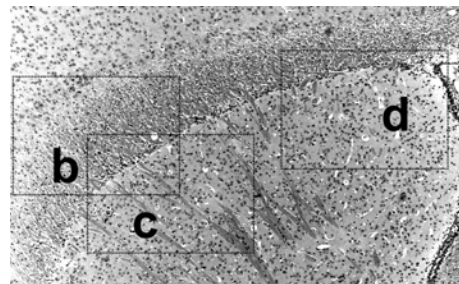

<sup>e</sup>Mean ± standard deviation

<sup>f</sup>Mouse IDs and abnormally increased BrdU counting (more than twice of average of control) were highlighted by a bold font.
