# Supplementary material
Source: PubMed Central journal article supplement (PMC2760841)

# Kwon et al., Supplementary Figure 1

## A

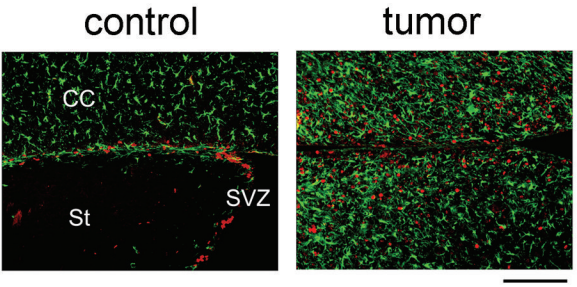

## B

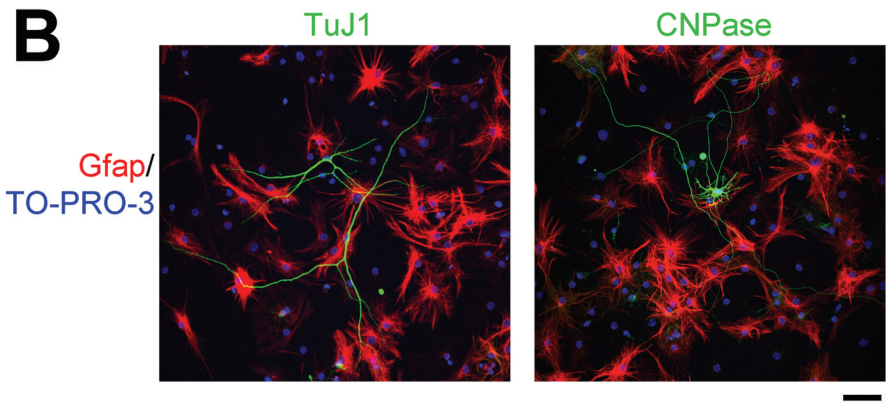

## C

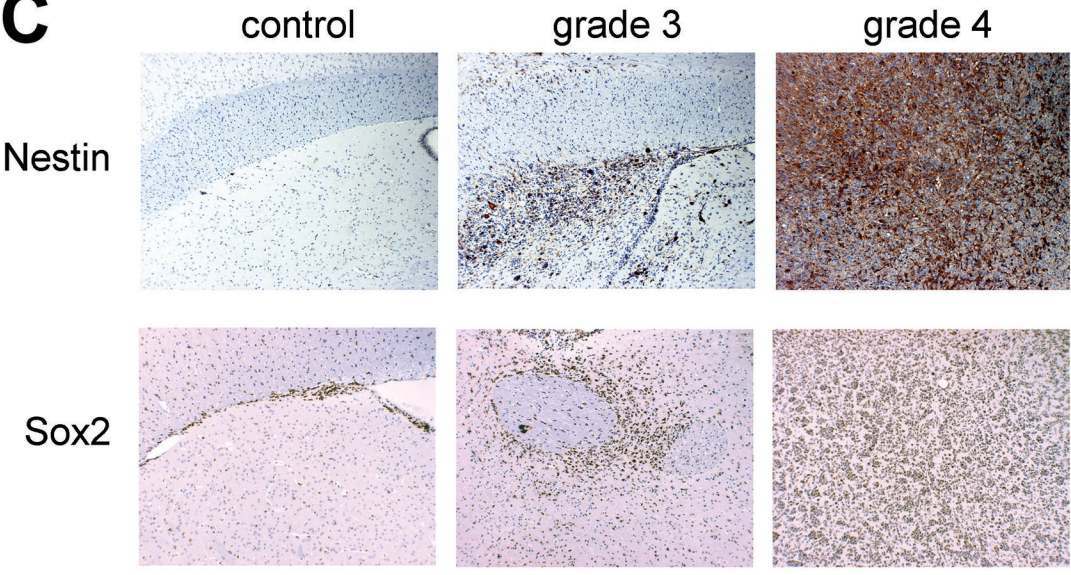

Supplement: NIHMS149010-supplement-Supp_Figures.pdf [file NIHMS149010-supplement-Supp_Figures.pdf]
